# Supplementary material for: Synthesis, Characterization, and Tautomerism of 1,3-Dimethyl Pyrimidine-2,4,6-Trione s-Triazinyl Hydrazine/Hydrazone Derivatives
Source: Hindawi journal article supplement (doi:10.1155/2017/5702962), 2017-01-01
Supplement: f1 [file 5702962.f1.docx]

**Supporting Information**

**Synthesis, Characterization, and Tautomerism of 1,3-Dimethyl Pyrimidine-2,4,6-Trione s-Triazinyl Hydrazine/Hydrazone Derivatives**

Anamika Sharma, Yahya Jad, Mohammed R. H. Siddiqui, Beatriz G. de la Torre, Fernando Albericio, * and Ayman El-Faham*

**Table of content**

**Figure S1: 1H NMR and 13 C NMR for 2c**

**Figure S2: 1H NMR and 13 C NMR for 2d**

**Figure S3: 1H NMR and 13 C NMR for 2e**

**Figure S4: 1H NMR and 13 C NMR for 2c**

**Figure S5: 1H NMR and 13 C NMR for 2g**

**Figure S6: 1H NMR and 13 C NMR for 2h**

**Figure S7: 1H NMR and 13 C NMR for 4**

**Figure S8: 1H NMR and 13 C NMR for 5a**

**Figure S9: HRMS forcompound 5a**

**Figure S10: 1H NMR and 13C NMR for 5b**

**Figure S11: HRMS for compound 5b**

**Figure S12: 1H NMR and 13C NMR for 5c**

**Figure S13: HRMS for compound 5c**

**Figure S14: 1H NMR and 13C NMR for 5d**

**Figure S15: HRMS for compound 5d**

**Figure S16: 1H NMR and 13C NMR for 5e**

**Figure S17: HRMS for compound 5e**

**Figure S18: 1H NMR and 13C NMR for 5f**

**Figure S19: HRMS of compound 5f**

**Figure S20: 1H NMR and 13C NMR for 5g**

**Figure S21: HRMS for compound 5g**

**Figure S22: 1H NMR and 13C NMR for 5h**

**Figure S23: HRMS for compound 5h**

**Figure S1: 1H NMR and 13 C NMR for 2c**


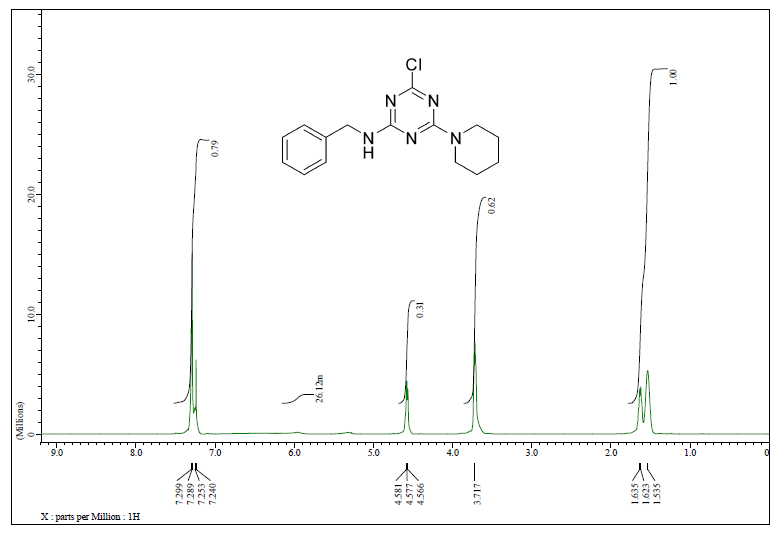


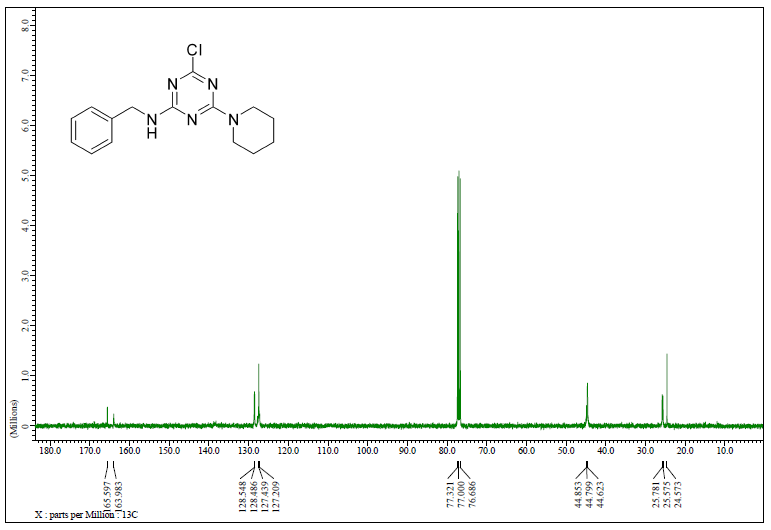


**Figure S2: 1H NMR and 13 C NMR for 2d**


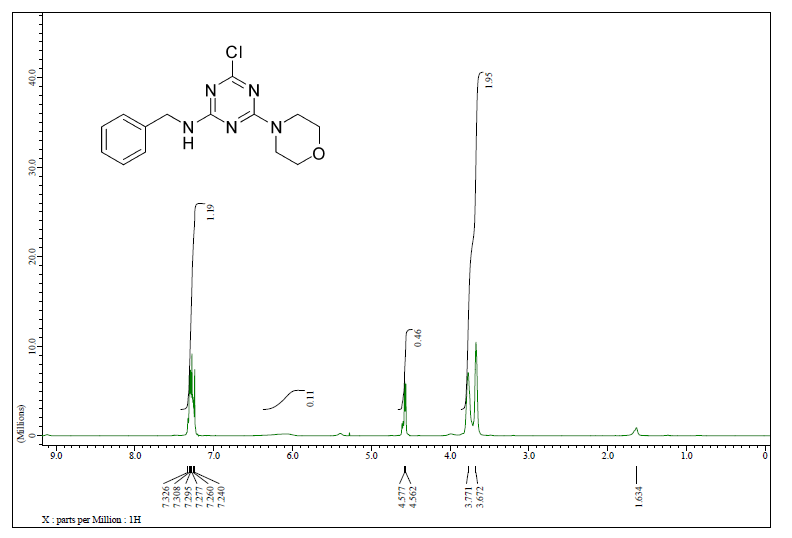


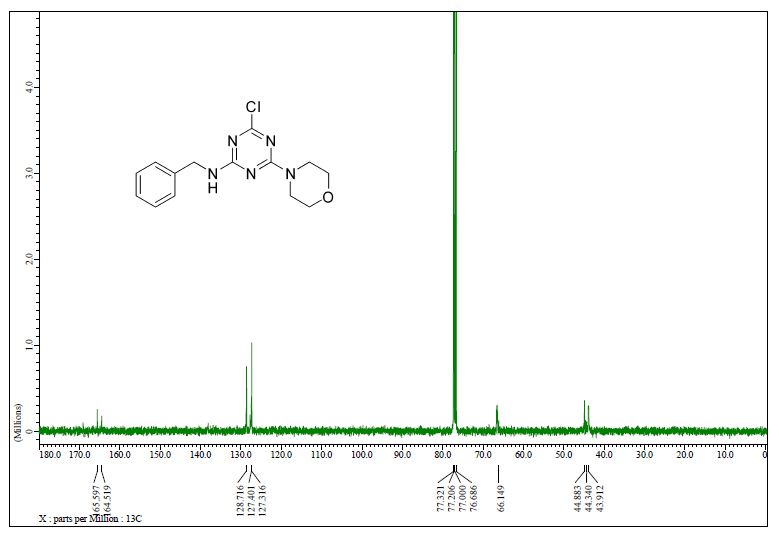


**Figure S3: 1H NMR and 13 C NMR for 2e**


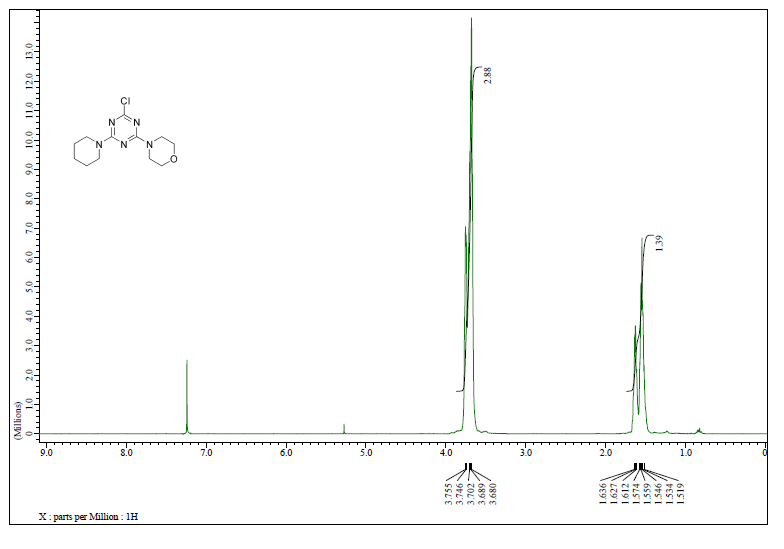


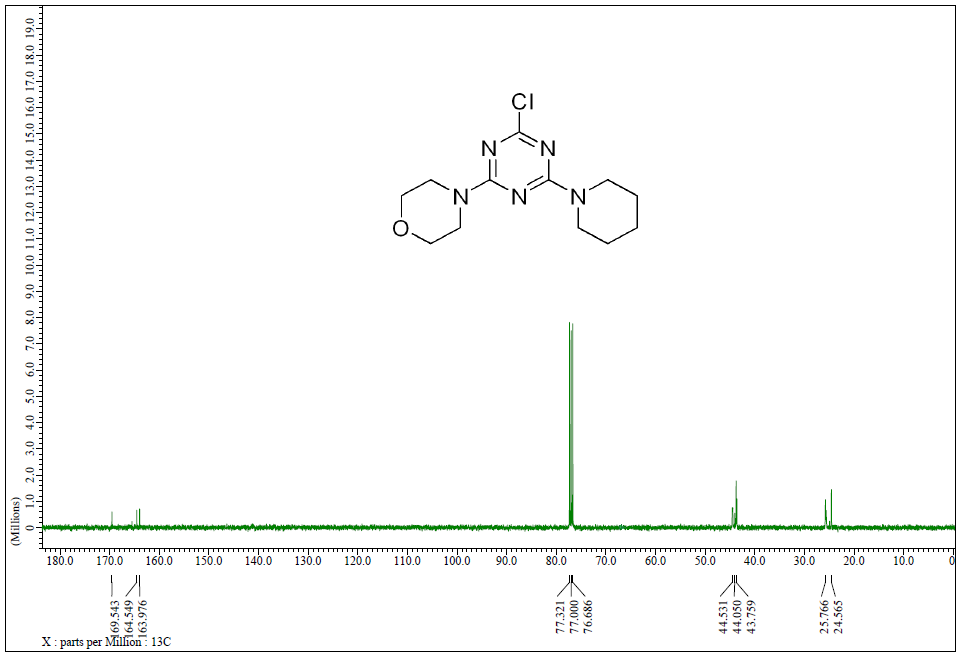


**Figure S4: 1H NMR and 13 C NMR for 2c**


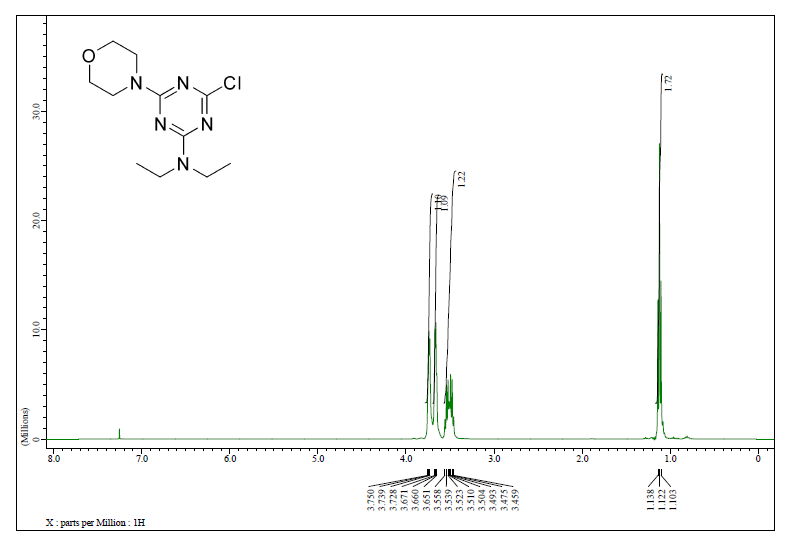


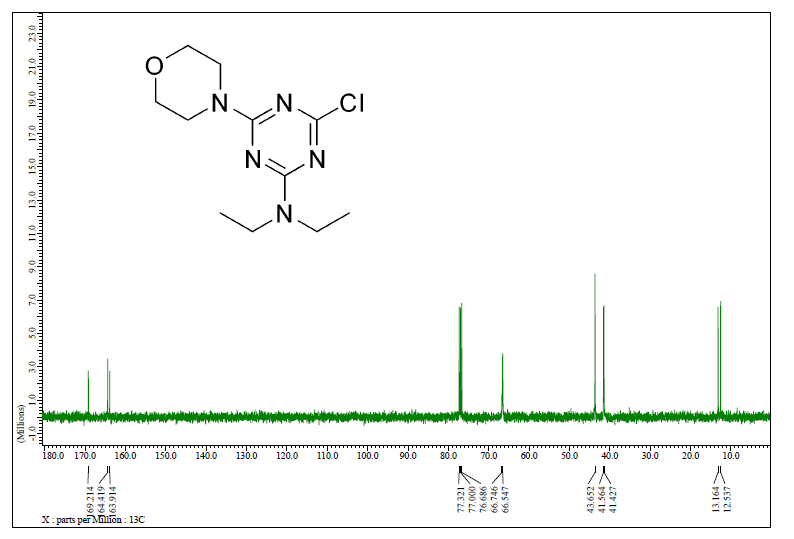


**Figure S5: 1H NMR and 13 C NMR for 2g**


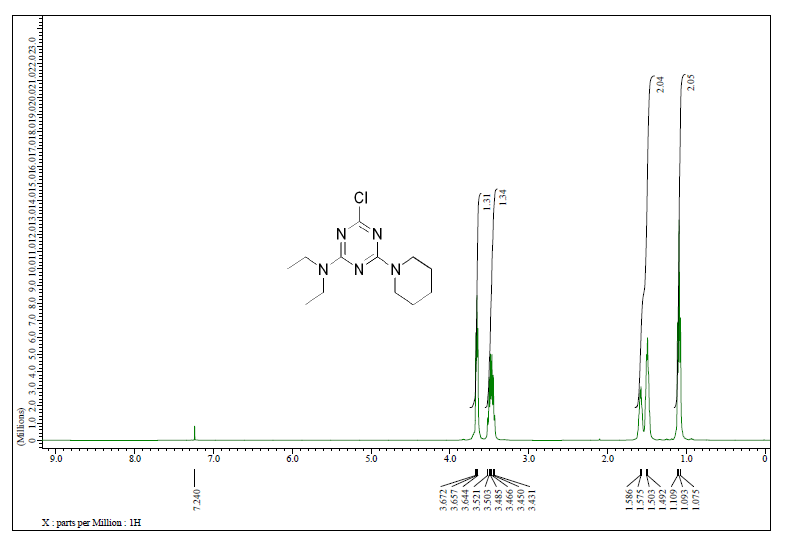


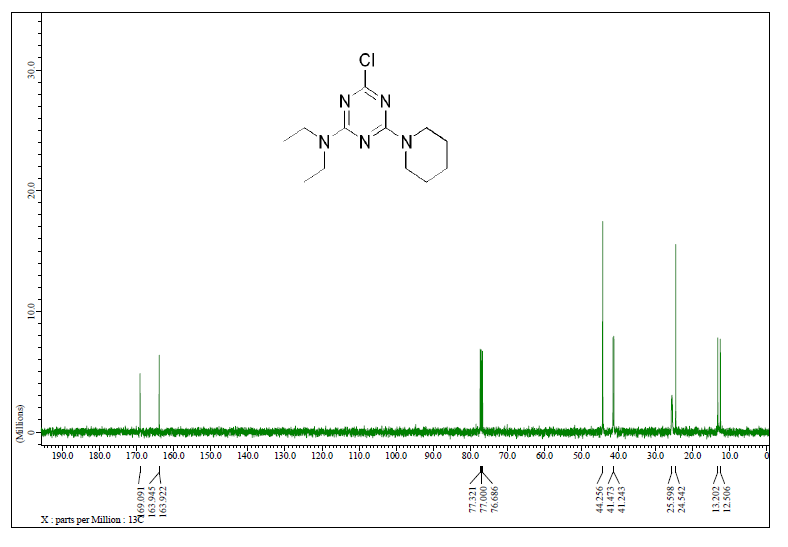


**Figure S6: 1H NMR and 13 C NMR for 2h**


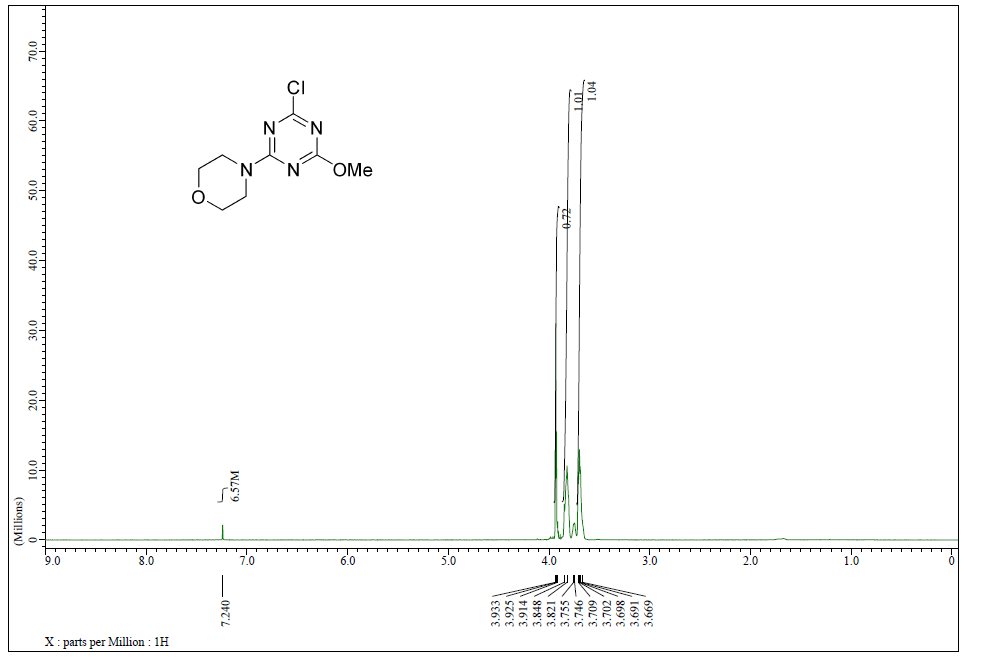


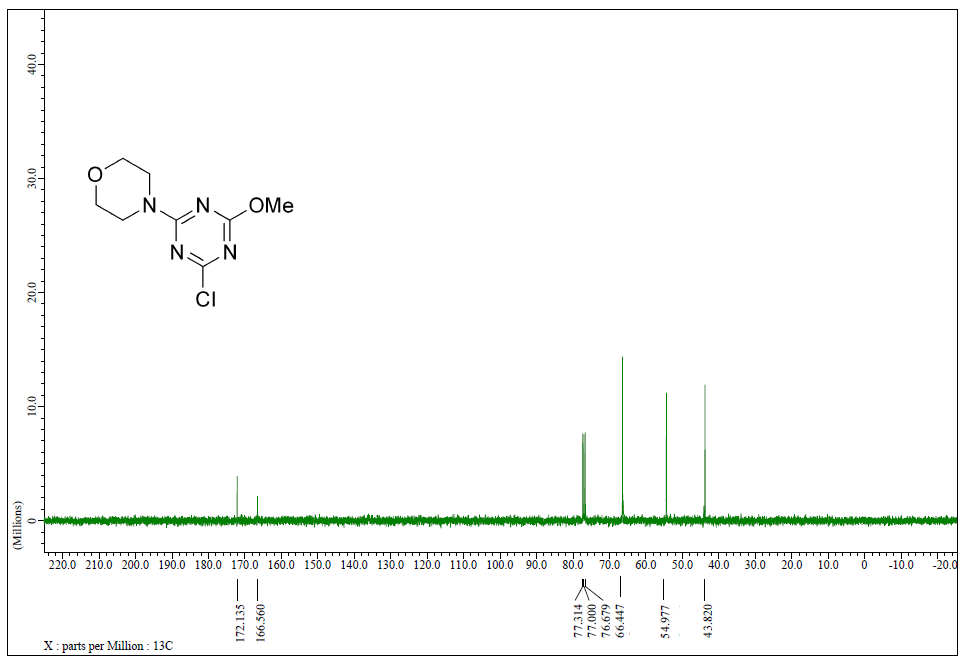


**Figure S7: 1H NMR and 13 C NMR for 4**


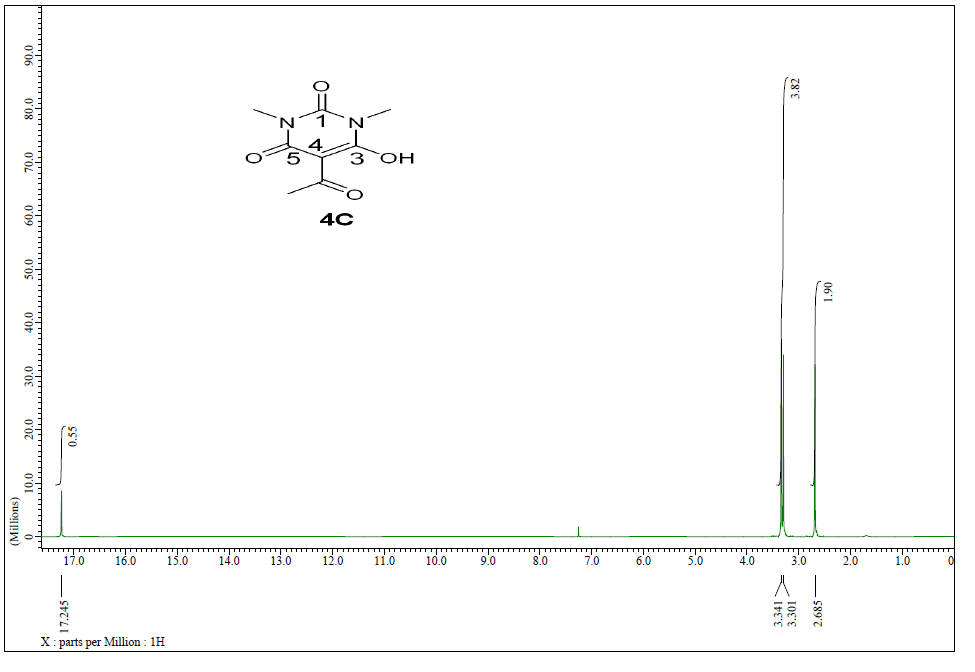


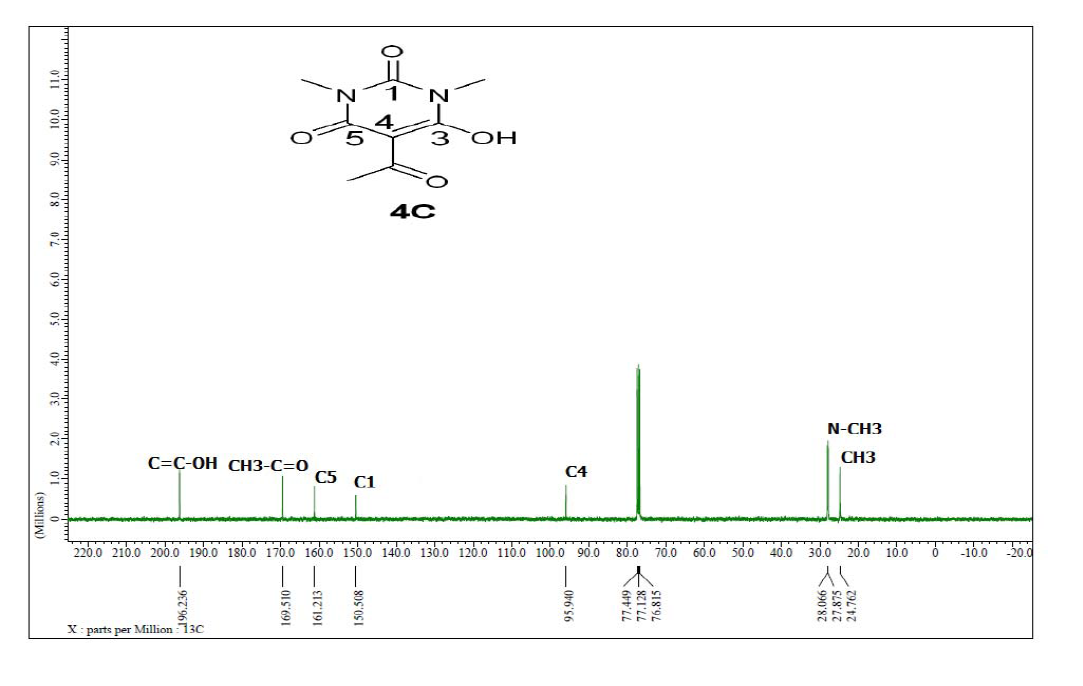


**Figure S8: 1H NMR and 13 C NMR for 5a**


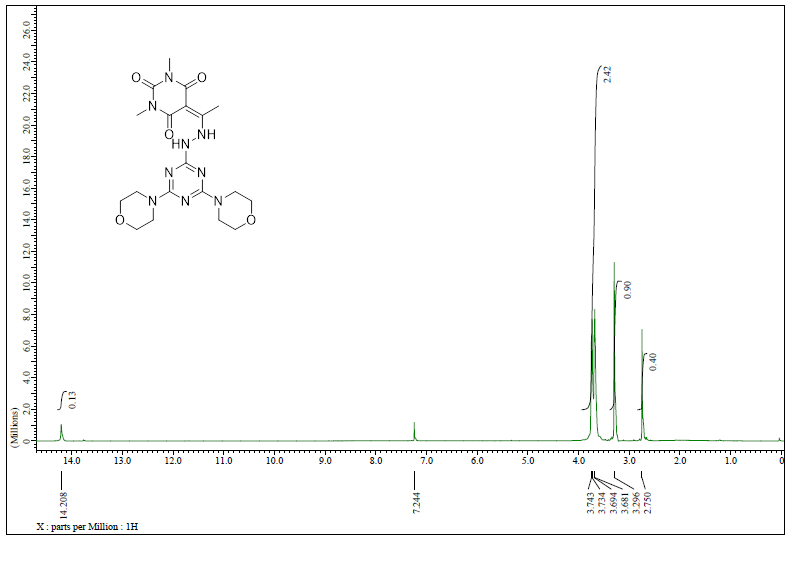


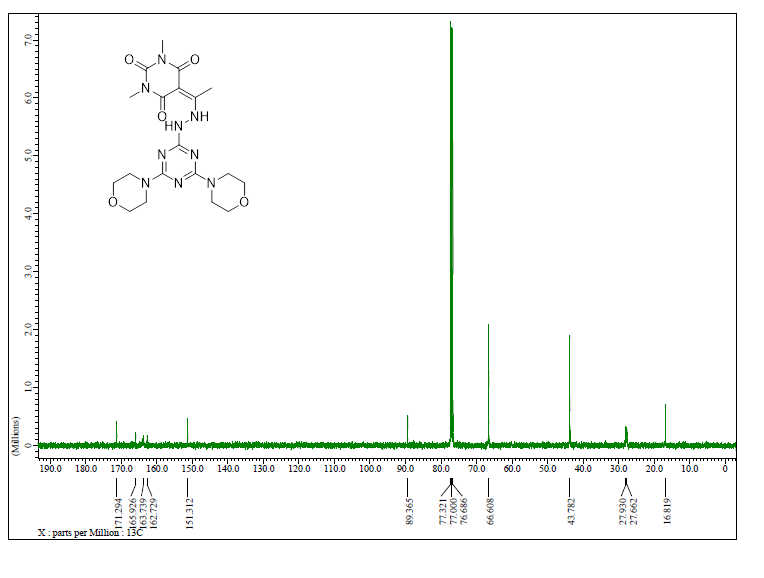


**Figure S9: HRMS forcompound 5a**

**Figure S10: 1H NMR and 13C NMR for 5b**


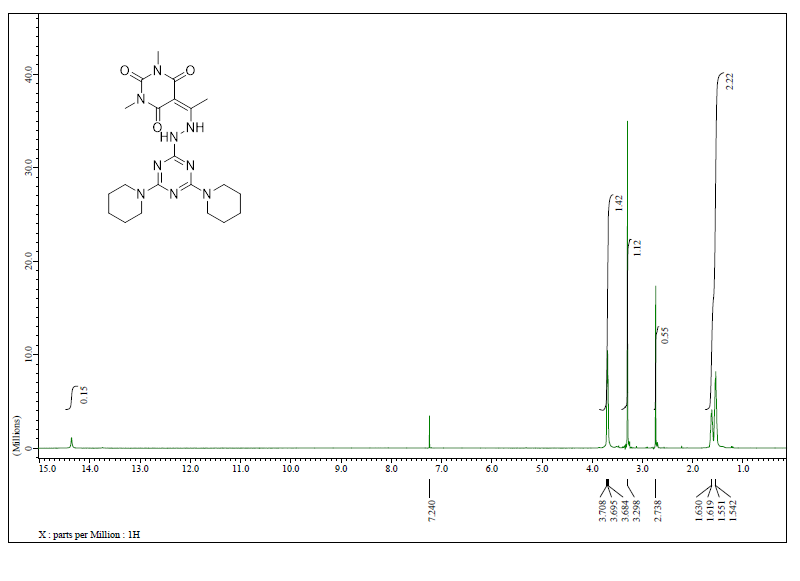


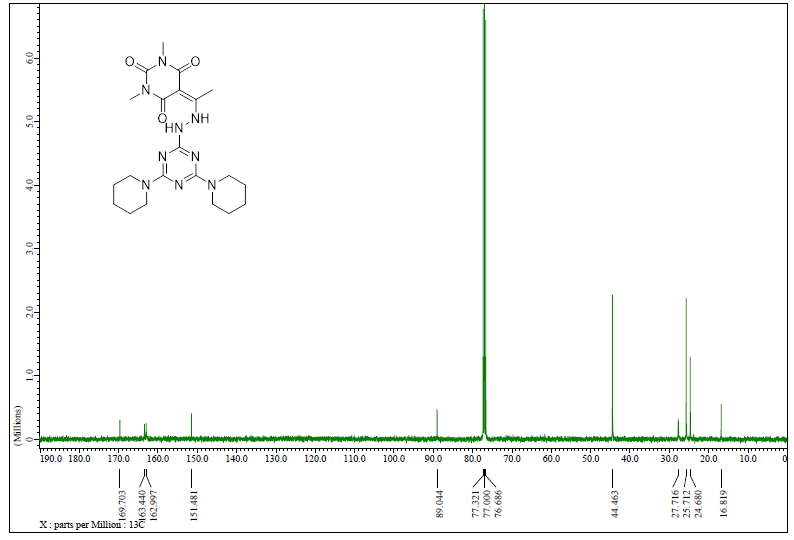


**Figure S11: HRMS for compound 5b**

**Figure S12: 1H NMR and 13C NMR for 5c**


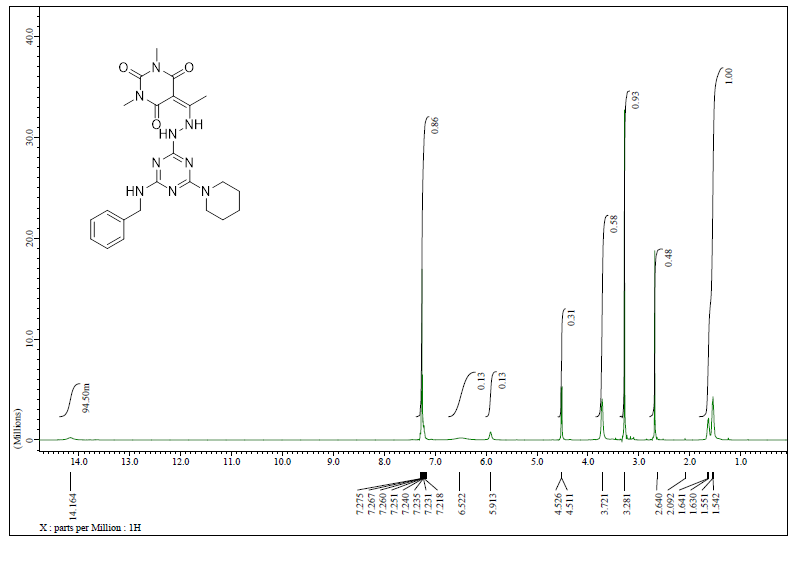


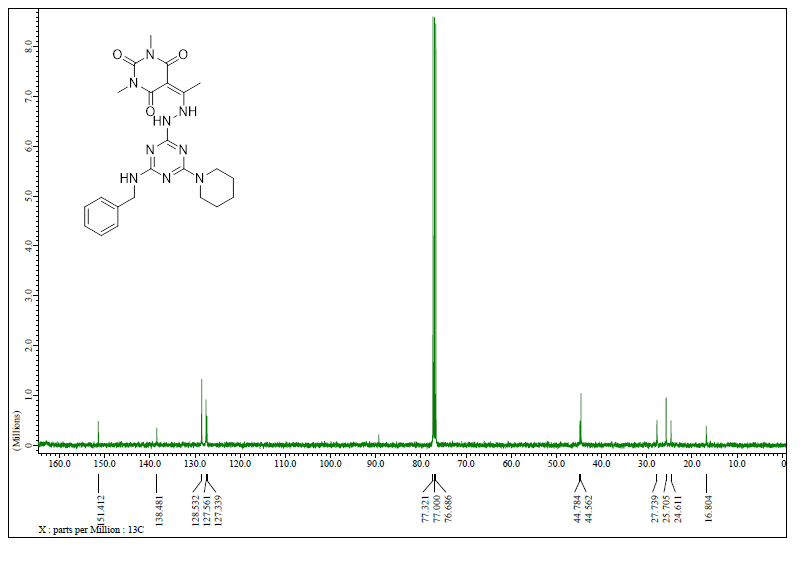


**Figure S13: HRMS for compound 5c**

**Figure S14: 1H NMR and 13C NMR for 5d**


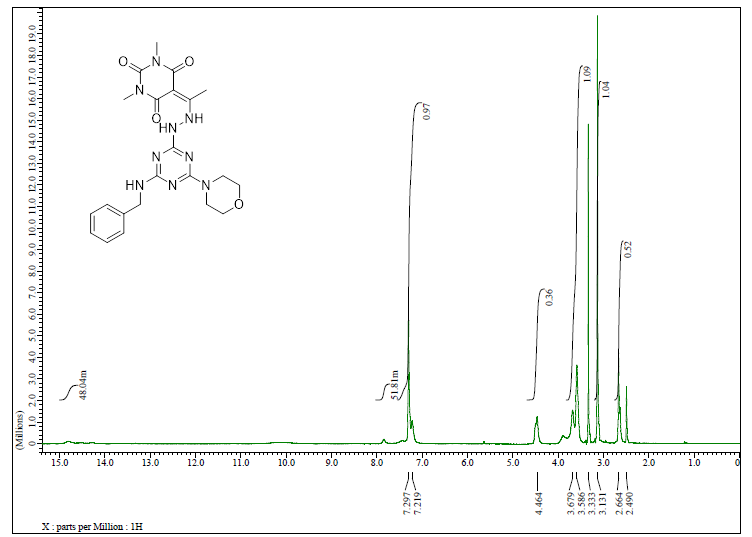


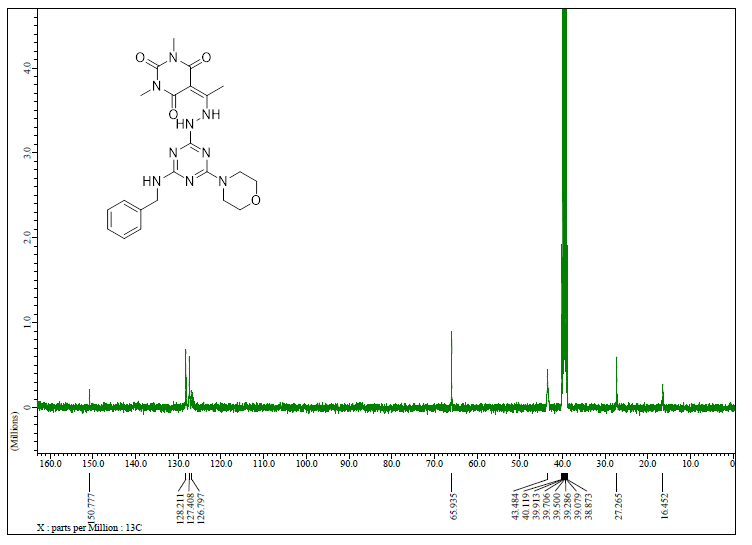


**Figure S15: HRMS for compound 5d**

**Figure S16: 1H NMR and 13C NMR for 5e**


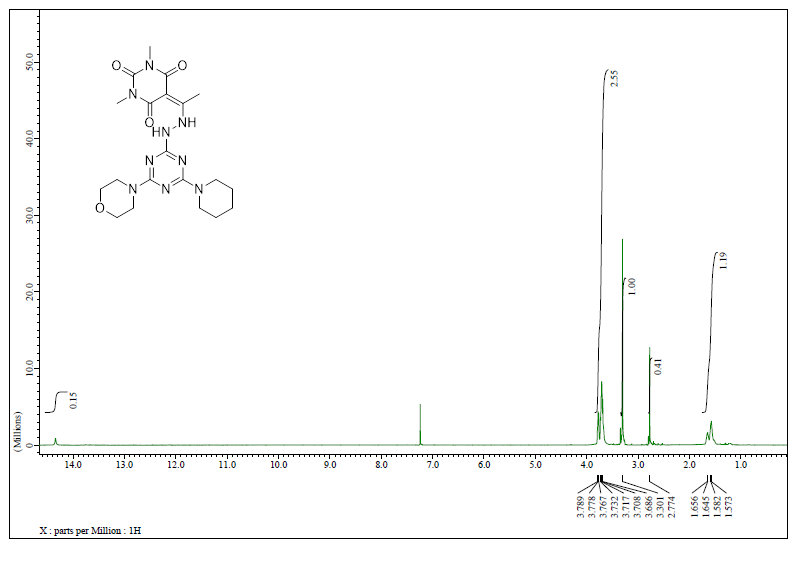


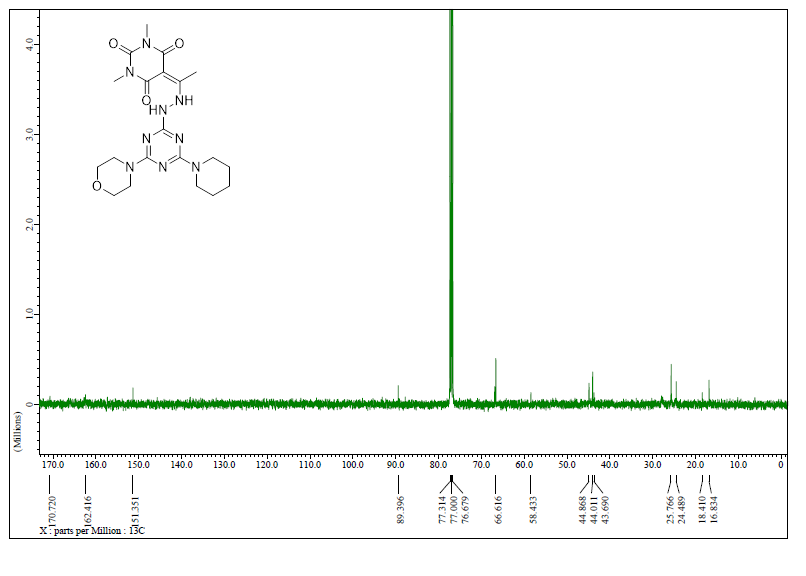


**Figure S17: HRMS for compound 5e**

**Figure S18: 1H NMR and 13C NMR for 5f**


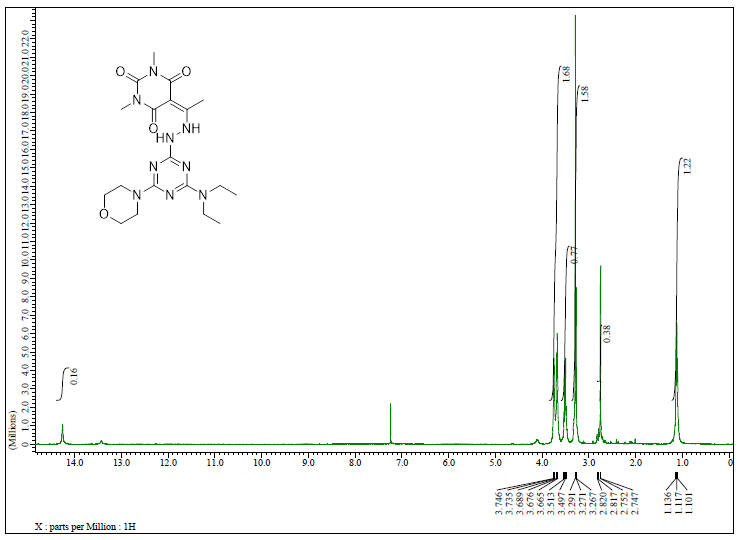


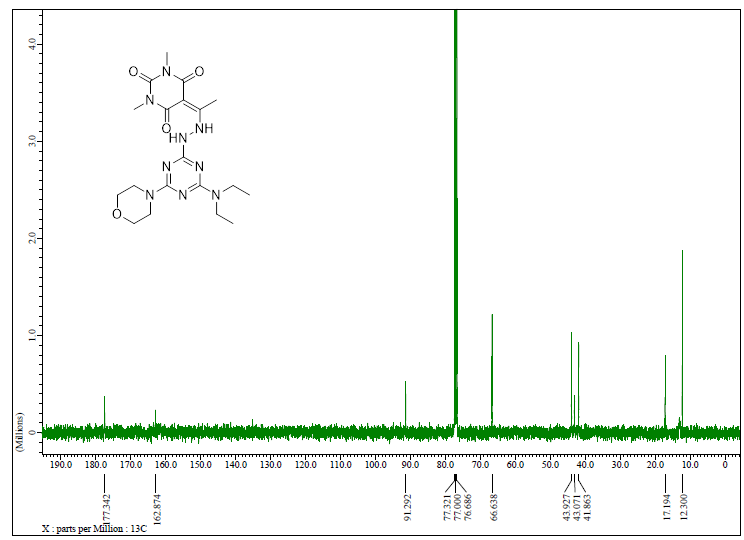


**Figure S19: HRMS of compound 5f**

**Figure S20: 1H NMR and 13C NMR for 5g**


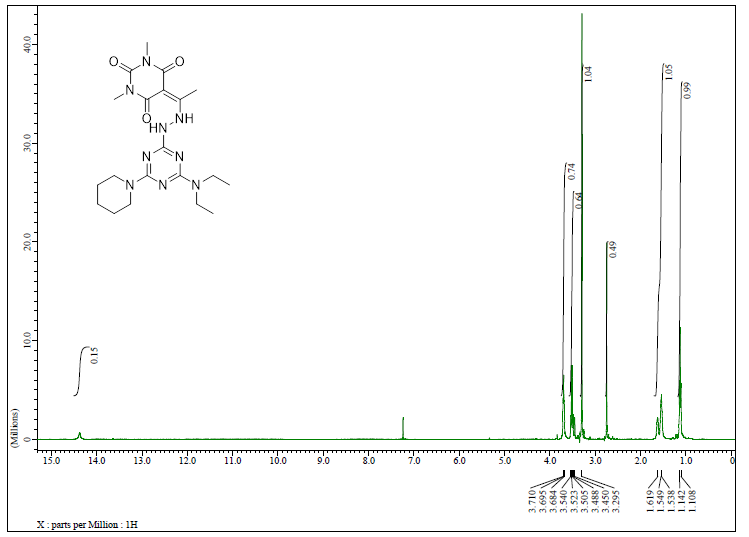


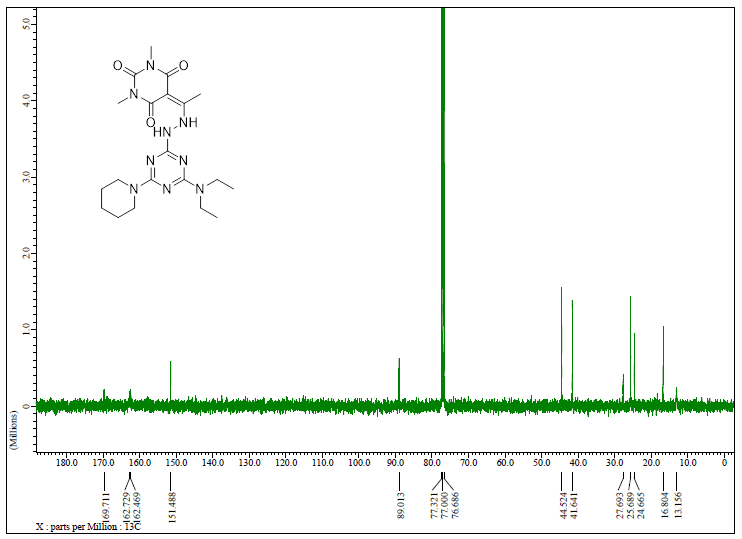


**Figure S21: HRMS for compound 5g**

**Figure S22: 1H NMR and 13C NMR for 5h**


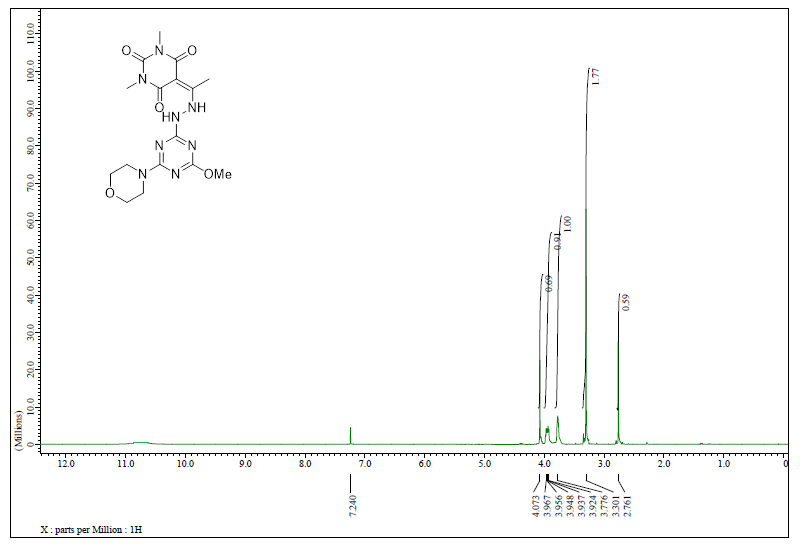


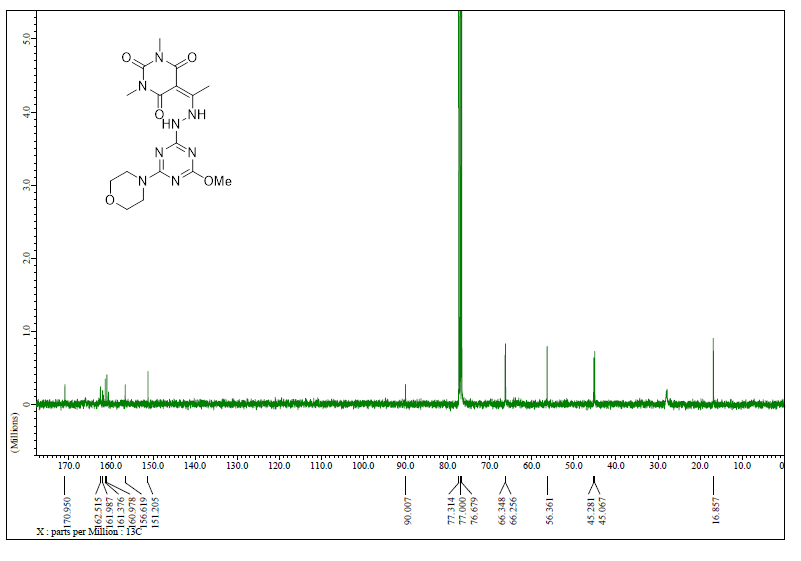


**Figure S23: HRMS for compound 5h**
